# Supplementary material for: Interfacial engineering for highly efficient quasi-two dimensional organic–inorganic hybrid perovskite light-emitting diodes
Source: Royal Society of Chemistry journal article supplement (doi:10.1039/c8tc06490c), 2019-01-01
Supplement: c8tc06490c1.pdf [file c8tc06490c1.pdf]

# Supporting Information

## Interfacial Engineering for Highly Efficient Inorganic Perovskite Light-Emitting Diodes

Qing-Wei Liu, Shuai Yuan, Shuang-Qiao Sun, Wei Luo, Yi-Jie Zhang, Liang-Sheng Liao,\* and Man-Keung Fung\*

Jiangsu Key Laboratory for Carbon-Based Functional Materials & Devices, Institute of Functional Nano & Soft Materials (FUNSOM), Soochow University, Suzhou, Jiangsu 215123, China.

\*E-mail: [mkfung@suda.edu.cn](mailto:mkfung@suda.edu.cn)(Man-Keung Fung)

### Table of Contents

**Figure S1.** Molecular structure of betaine.

**Figure S2.** Schematic diagram of energy alignment of devices.

**Figure S3.** J-V curve of the device.

**Figure S4.** Histogram of peak EQEs measured from 32 devices.

**Figure S5.** Distribution of emitting intensity according to various angle.

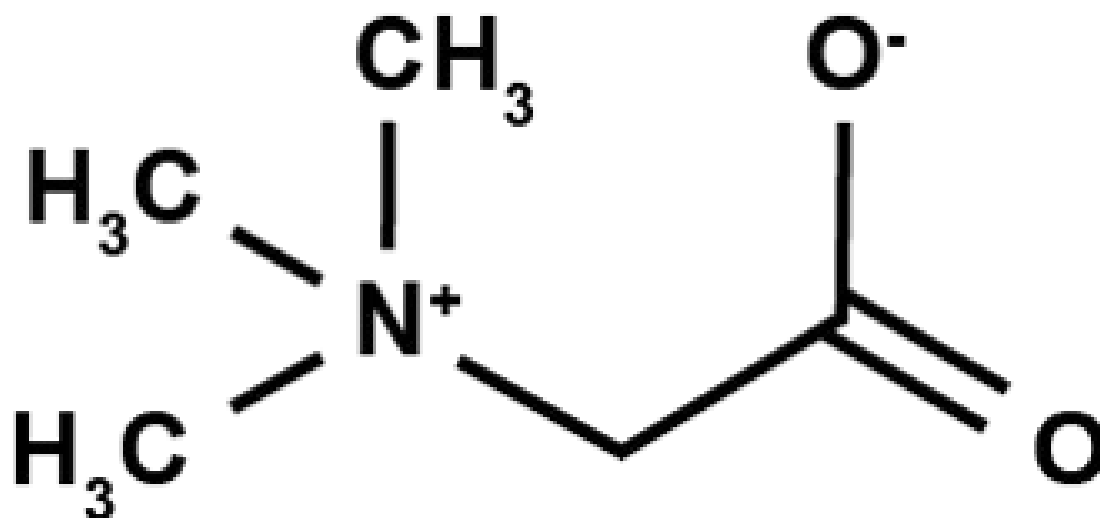

Figure S1. Molecular structure of betaine.

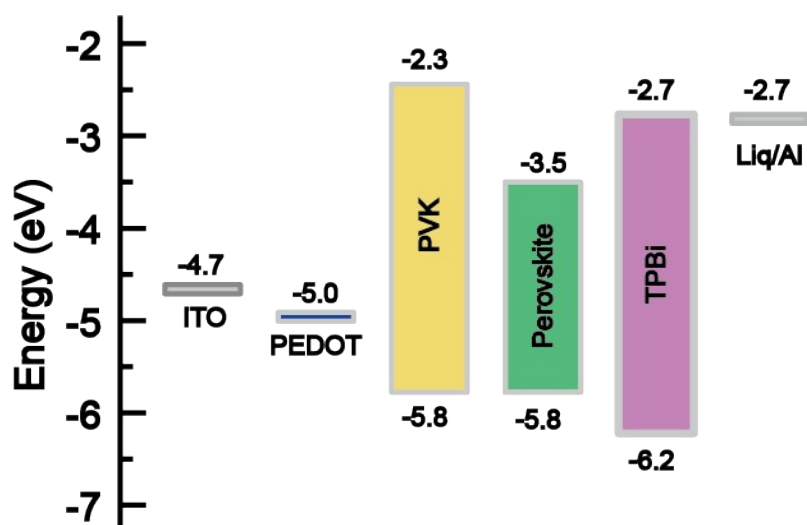

Figure S2. Schematic diagram of energy alignment based on devices' structure of ITO/PEDOT:PSS/PVK/Perovskite/TPBi/Liq/Al.

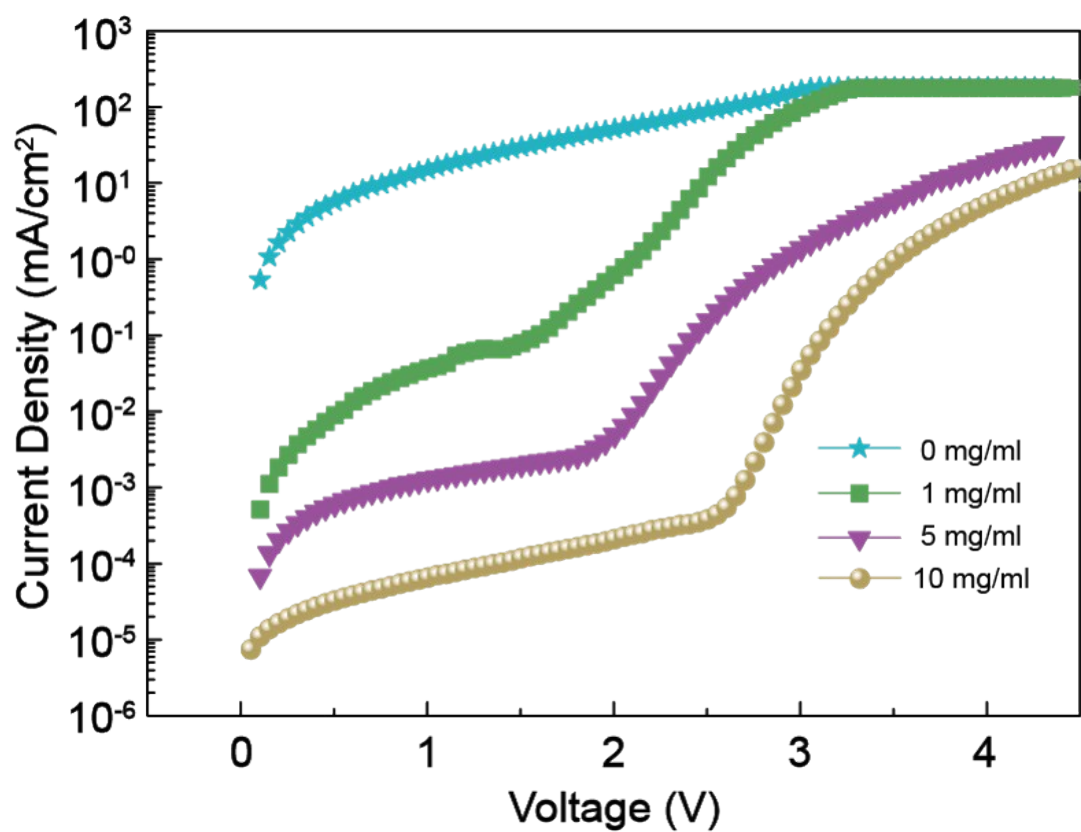

**Figure S3.** J-V curve of the device discussed in Figure. 5(d). This device shows extremely low electric leakage below  $10^{-4}$  mA/cm<sup>2</sup>.

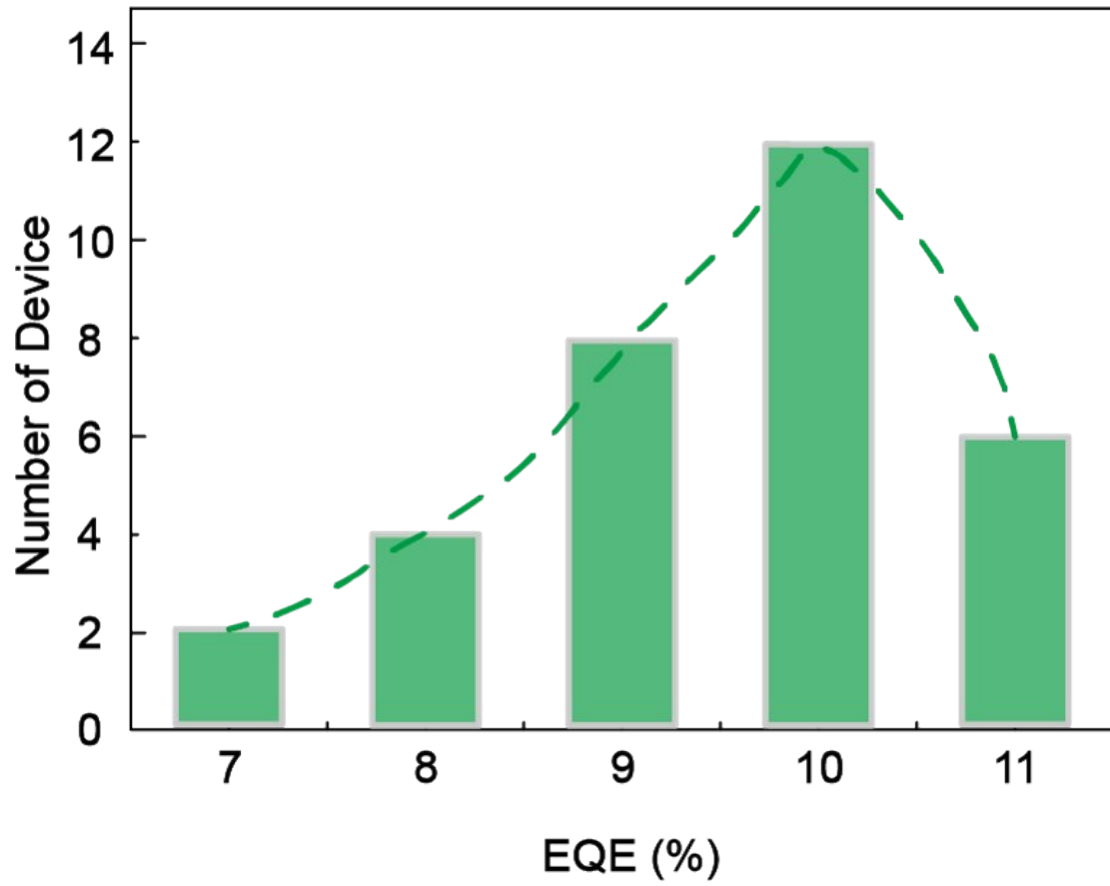

**Figure S4.** A histogram of EQEs with an average value of 9.5% for 32 devices.

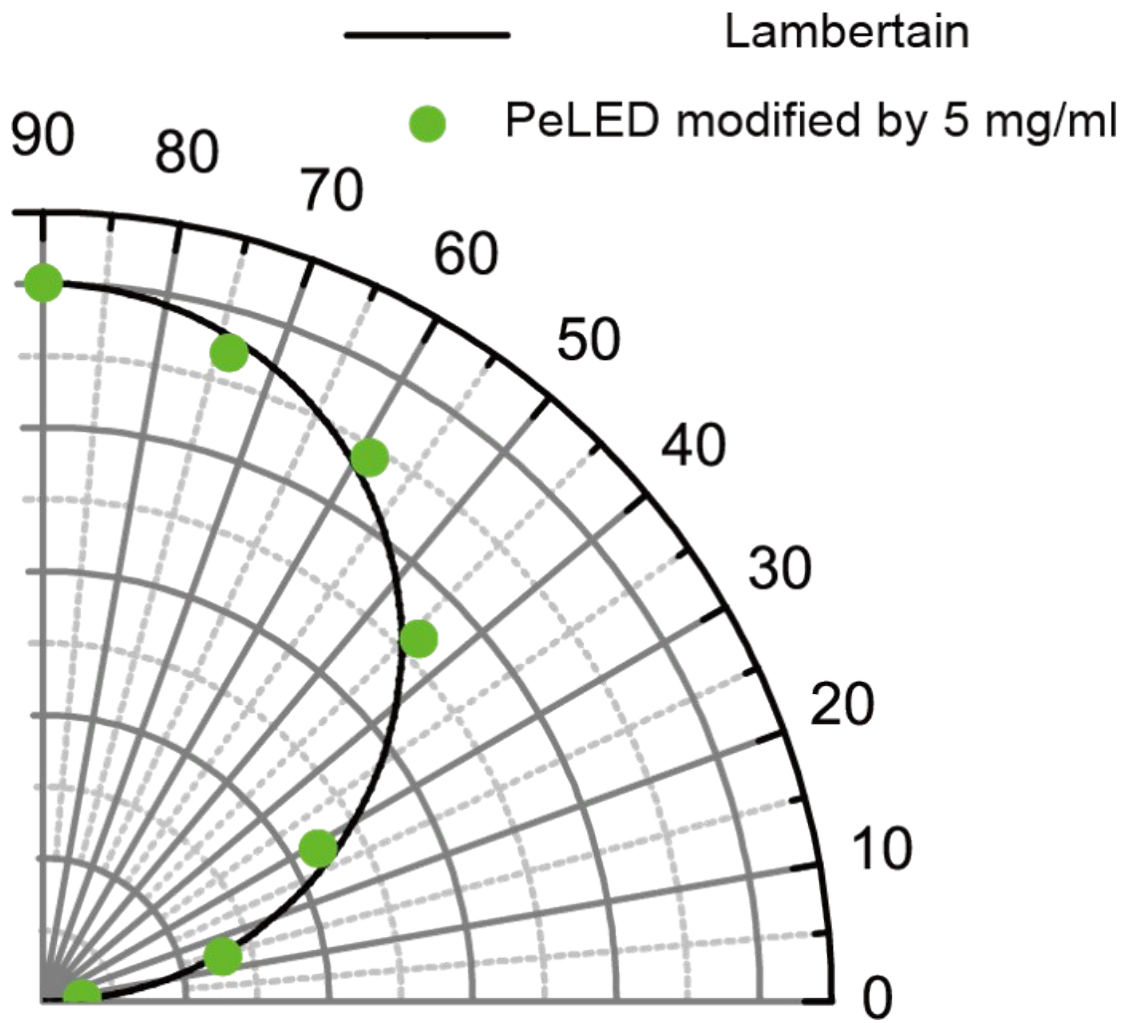

**Figure S5.** Distribution of emitting intensity according to various angle. Lambertian emitter and the EL intensity are marked in different colors.
